1 **Known mechanisms account for less than half of antimicrobial resistance in a diverse**  
2 **collection of non-*aureus* staphylococci.**

3

4 Heather Felgate<sup>1,4</sup>, Lisa C. Crossman<sup>1,2,3</sup>, Elizabeth Gray<sup>1</sup>, Rebecca Clifford<sup>1</sup>, John Wain<sup>1,2</sup>, and  
5 Gemma C. Langridge<sup>1,4</sup>

6

7 Affiliations

8 1. Medical Microbiology Research Laboratory, Norwich Medical School, University of  
9 East Anglia, Norwich Research Park, Norwich, NR4 7UQ, United Kingdom.

10 2. School of Biological Sciences, University of East Anglia, Norwich Research Park,  
11 Norwich, NR4 7TJ, United Kingdom.

12 3. SequenceAnalysis.co.uk, Norwich Research Park Innovation Centre, Norwich, NR4  
13 7JG, United Kingdom.

14 4. Current address: Quadram Institute Bioscience, Norwich Research Park, Norwich,  
15 NR4 7UA, United Kingdom.

16

17 Running title: Antimicrobial resistance in non-*aureus* staphylococci

18 **Abstract**

19 Introduction: Non-*aureus* staphylococci (NAS) are implicated in many healthcare-acquired  
20 infections and an understanding of the genetics of antimicrobial resistance in NAS is  
21 important in relation to both clinical intervention and the role of NAS as a reservoir of  
22 resistance genes.

23 Gap statement: The burden of antimicrobial resistance in NAS, particularly to clinically  
24 relevant antimicrobials, is understudied.

25 Methodology: We sourced 394 NAS isolates from clinical samples, healthy human  
26 volunteers, animals and type cultures and subjected them to agar dilution susceptibility  
27 testing against eight antimicrobials. We performed whole genome sequencing on 316  
28 isolates and analysed these genotypically for the presence of genetic mechanisms  
29 responsible for the phenotypic levels of reduced antimicrobial susceptibility.

30 Results: Cefoxitin is used to screen for methicillin resistance in *S. aureus*, as it stimulates  
31 expression of *mecA*. We observed 174 isolates with an MIC of at least 4 µg/ml to cefoxitin,  
32 of which sequencing revealed 47.6% (80/168) did not harbour a known *mec* homologue.  
33 Seven clinical NAS isolates displayed high daptomycin minimum inhibitory concentrations  
34 (MICs) (>4 µg/ml), with no known mechanism identified. Differences in MICs against  
35 erythromycin were attributable to the presence of different resistance genes (*msrA* and  
36 *ermC*). In total, 49% (187/394) of isolates displayed reduced susceptibility to three or more  
37 of the antimicrobials tested.

38 Conclusions: The widespread presence of reduced antimicrobial susceptibility in NAS is a  
39 concern, with an increased likelihood of (1) harder to treat infections caused directly by  
40 NAS, and (2) resistance genes being passed on to other bacteria via horizontal gene transfer,  
41 both of which have clinical implications for treatment and management of patients.

## 42 **Introduction**

43 The non-*aureus* staphylococci (NAS) represent an important source of nosocomial disease,  
44 including prosthetic joint infection (PJI), infective endocarditis and infection in pre-term  
45 babies (1). In the UK, over 215,000 joint replacements (hip, knee and shoulder) took place in  
46 2016, with a year-on-year increase of 4% (2). Of these replacements, 1.5% require surgical  
47 revision due to infection (2). These infections are most commonly caused by *Staphylococcus*  
48 spp., and attributed to NAS in approximately 31% of cases across Europe (3). In our local  
49 hospital, the Norfolk and Norwich University Hospital (NNUH), 50% of isolates identified in  
50 suspected PJI are NAS.

51 In clinical microbiology, staphylococci are classified using the coagulase test, with coagulase  
52 positive samples overwhelmingly identified as *S. aureus* and coagulase negative samples  
53 grouped together under the term coagulase negative staphylococci (CoNS). CoNS is  
54 therefore the term found in antimicrobial surveillance data. However, since coagulase  
55 negative *S. aureus* strains exist (as do coagulase positive strains of other staphylococcal  
56 species), we use the term “non-*aureus* staphylococci” (NAS) to encompass all staphylococci  
57 which are not *S. aureus*, regardless of coagulase activity.

58 There is currently an intense focus upon the presence and spread of bacterial antimicrobial  
59 resistance, typified in *S. aureus* by methicillin resistance (MRSA). While the body of  
60 literature in antimicrobial resistance research is growing for staphylococci, NAS data  
61 remains eclipsed by the focus on *S. aureus*. Few studies have investigated antimicrobial  
62 resistance (AMR) in NAS. Those that have suggest 45% of NAS harbour methicillin resistance  
63 (4), and that NAS may be resistant to a larger number of antimicrobial classes than *S. aureus*  
64 (4, 5).

65 An understanding of the genetics of AMR in NAS is important in relation to clinical  
66 intervention upon diagnosis of PJI (and other infections) as well as understanding the role of  
67 NAS as a reservoir of resistance genes. To address this, we assembled a collection of 400  
68 NAS from clinical samples, healthy human volunteers, animals and type cultures and  
69 assessed their susceptibility to a range of antimicrobials. We also performed whole genome  
70 sequencing to correlate mechanisms of resistance with minimum inhibitory concentrations  
71 (MICs).

72

### 73 **Materials & Methods**

#### 74 *NAS collection*

75 Under NHS Research Ethics Committee approval, the Norwich Biorepository banks blood,  
76 solid tissue and bacterial isolates from the NNUH and research institutes on the Norwich  
77 Research Park, including the University of East Anglia, and makes these available to the  
78 research community. This enabled us to assemble a collection of 380 NAS from a) clinical  
79 specimens which were isolated from suspected NAS PJI infections (229, NNUH), b) healthy  
80 human volunteers (114, UEA), and c) animal samples (32, UEA) with five having no source  
81 recorded. An additional 14 strains of NAS from the National Collection of Type Cultures  
82 (NCTC) were supplied by Public Health England.

83 Isolates were identified using MALDI-TOF (Bruker) to the species level (Table 1). All strains  
84 were cultured overnight on TSA plates (Oxoid), checked for contamination and purified.  
85 Once purified, the NAS collection was stored as glycerol stocks to be screened for their  
86 antimicrobial susceptibility. *Staphylococcus aureus* NCTC 12973 was used as a control.

87

#### 88 *Susceptibility testing*

89 To assay the entire NAS collection, five deep well 96-well microplates (VWR) were prepared  
90 with 1 ml TSB (Oxoid) per well. Glycerol stocks were used to inoculate the corresponding  
91 well. Per plate, one well was designated as a sterility control (TSB only) and one well was  
92 inoculated with the *S. aureus* control. After inoculation, plates were sealed and incubated  
93 at 37 °C at 180 rpm for a minimum of 10 hours. The experimental design enabled 13.5% of  
94 the collection to be tested in duplicate; so MIC data was compared and then tabulated, MIC  
95 data is given in Table S1.

96 Iso-sensitest agar (Oxoid) was prepared in 250 ml aliquots and autoclaved. Antimicrobial  
97 stocks were added to obtain the desired final concentrations once the media had cooled to  
98 < 50 °C. For daptomycin, Ca<sup>2+</sup> was also added at 50µg/ml. The agar antimicrobial mixture  
99 was then poured into sterile rectangular plates (Fisher Scientific) and dried.

100 Per strain, a 1:10 dilution of overnight culture was transferred to a 96 well plate and the  
101 OD<sub>600</sub> was measured. An average OD<sub>600</sub> was calculated for each column, which was then  
102 diluted to approximately OD<sub>600</sub> 0.6 to generate an inoculum plate for susceptibility testing.

103 Using a 96-pin multi-point inoculator (Denley), ~1 µl of inoculum per isolate was stamped  
104 onto the agar containing antimicrobials, from the lowest concentration to the highest.  
105 Between inoculum plates, the pins were washed in 70 % ethanol for 30 s and allowed to dry  
106 before stamping on an antimicrobial-free plate to confirm sterility. Washes were also  
107 carried out between antimicrobials using sterile water. All stamped plates were incubated at  
108 37 °C.

109 Isolates found to have reduced susceptibility to daptomycin had their MICs determined for a  
110 second time by spotting 10 µl of culture onto TSA plates containing various daptomycin  
111 concentrations (supplemented with Ca<sup>2+</sup> at 50 µg/ml).

112 Test MIC ranges were determined from British Society for Antimicrobial Chemotherapy  
113 (BSAC) surveillance MIC data for coagulase negative staphylococci (CoNS) in 2016 (6). Data  
114 for daptomycin were taken from 2010. In µg/ml, the ranges tested were: daptomycin 0.25-  
115 4, erythromycin 0.125-256, gentamicin 0.016-64, rifampicin 0.004-0.064, teicoplanin 0.25-  
116 16, tetracycline 0.25-256 and vancomycin 1-4. No CoNS surveillance data were available for  
117 cefoxitin, hence the test range of 0.25-4 µg/ml was based upon published work (7) .

118

#### 119 *Statistical comparison of clinical and non-clinical isolates*

120 Using Prism (GraphPad, San Diego, USA, v 5.04), a Mann-Whitney test was performed (non-  
121 parametric test, two-tailed with Gaussian approximation) to compare between the MIC of  
122 clinical and non-clinical isolates. Statistical significance was given to a p value < 0.05.

123

#### 124 *DNA extraction and sequencing*

125 Overnight cultures derived from single colonies were pelleted and resuspended in lysis  
126 buffer (Qiagen), transferred to 2 ml lysis matrix B tubes (MPBio) and subjected to bead  
127 beating for 15 min at 30 Hz (Tissuelyser II, Qiagen) with RNase A added. DNA was extracted  
128 according to the QiaCube HT protocol with an additional 30 min incubation at 65 °C after  
129 proteinase K addition and eluted into Tris-10mM HCL.

130

131 Libraries for sequencing were prepared using the Nextera XT DNA Library Prep Protocol and  
132 sequenced on the Illumina MiSeq or NextSeq with a loading concentration of 1.8 picomolar.

133

#### 134 *Genome analysis*

135 The raw reads were subject to FastQC quality control (8), adapters were trimmed using  
136 Trimmomatic [v 0.39] (9) using the supplied NexteraXT adapter sequences. In some cases,  
137 read normalisation was performed using BBNorm [v35.85] (10) to remove low coverage  
138 contamination. The lowest coverage cutoff level parameter used was dependent on the  
139 total coverage of the sequence since some sequencing runs had a high difference in  
140 coverage level across the run. Finally, reads were concatenated if they originated from  
141 Illumina NextSeq since this platform produces eight reads per sample, four forward and four  
142 reverse. A total of 366 samples sequenced for this project passed QC and were suitable for  
143 downstream analysis. These reads were used as described below. Sequences are available  
144 from the European Nucleotide Archive, under project PRJEB31403.

145 To determine which antimicrobial resistance genes were present in each of our 364 NAS  
146 genomes, reference gene sequences were downloaded from CARD v (11) and used as input  
147 to ARIBA v2.13.2 (12) which generates local assemblies from sequence reads and reports  
148 back which reference genes are identified, with a minimum percent identity cut off at 90%.  
149 The tabulated results were evaluated for gene/mutation presence/absence relative to MIC  
150 per antimicrobial. Twelve of the NCTC strains, for which sequence data were already  
151 available, were analysed by ABRicate v0.9.7 (13) using CARD v2.0.0 (11) as the reference  
152 database with a minimum DNA coverage of 90%. Protein level conservation was assessed  
153 using BLAST v2.10.1 against the NCBI AMR database. Hits were recorded for greater than  
154 40% identity at the protein level over 80% of the query and subject sequence.

155

156 **Results & Discussion**

157 Our NAS collection comprised over 30 species of *Staphylococcus*, including 10 or more  
158 isolates of *S. epidermidis*, *S. capitis*, *S. haemolyticus*, *S. hominis*, *S. saprophyticus*, *S. simulans*  
159 and *S. warneri* (Table 1). Isolates were collected over a four-year period from 2013 to 2016.

160 The range of antimicrobials tested were selected based upon clinical relevance and  
161 availability (Table S1). Observed MIC distributions per antimicrobial are shown in Figure 1.

162

### 163 *Cefoxitin screening does not correlate with mecA presence in clinically relevant NAS*

164 Cefoxitin is used to screen for methicillin resistance in *S. aureus* as it induces *mecA*  
165 expression. However, while methicillin resistant *S. aureus* (MRSA) have a high public profile,  
166 much less is known about methicillin resistant NAS (MRNAS). EUCAST guidelines state that  
167 for MRSA “cefoxitin is a very sensitive and specific marker of *mecA/mecC*-mediated  
168 methicillin resistance including in heterogeneous expressing strains and is the agent of  
169 choice” (14). In this collection, we found 174/394 (44%) displayed reduced susceptibility to  
170 cefoxitin with MICs  $\geq 4$   $\mu\text{g/ml}$  (Table S1). The vast majority of these isolates were from  
171 clinical samples (Figure 1) but analysis at the nucleotide level (Table S2 and S3) indicated  
172 that only 80/168 (47.6 %) with an MIC  $\geq 4\mu\text{g/ml}$  harboured a known *mecA*. MecA is  
173 extremely well-conserved and searching at the protein level yielded the same results (Table  
174 S4). Other *mec* elements were also identified (e.g. *mecC*, *mecI* and *mecR1*) but only ever in  
175 addition to *mecA*. No *mecA* was detected in twelve species with high cefoxitin MICs and for  
176 *S. haemolyticus*, *S. warneri*, *S. sciuri* and *S. simulans* the percentage of the population that  
177 exhibited MIC  $\geq 4\mu\text{g/ml}$  with no *mecA* was found between 58 and 88.9% (Figure 2).  
178 Conversely, presence of *mecA* did not result in a high cefoxitin MIC in multiple isolates of *S.*  
179 *hominis*, *S. haemolyticus* and *S. epidermidis*. Our results therefore do not support cefoxitin



180 as a universally good indicator of *mecA* presence in *S. epidermidis* (7), and suggest that it  
181 performs poorly in the less common, but still clinically relevant NAS.

182

### 183 *Clinical resistance only partly explained by known mechanisms*

184 When exposed to gentamicin and tetracycline, isolates could broadly be divided into two  
185 populations, displaying susceptible or reduced susceptibility phenotypes (Figure 1 GEN and  
186 TET). In isolates with an MIC  $\geq 1$   $\mu\text{g/ml}$  gentamicin, 49/130 harboured *aac(6')-Ie-aph(2'')-Ia*  
187 (Table 2) which is associated with gentamicin resistance in *Enterococcus* (15, 16) but has  
188 also been observed in *Staphylococcus* (17, 18). A total of 12 isolates had a match for  
189 *aph(3')/IIIa*, but only five of them were associated with reduced susceptibility.

190 Six isolates that contained *aac(6')-Ie-aph(2'')-Ia* displayed susceptible MICs, making them  
191 the equivalent of major errors (MEs) in public health terms, as the isolates were  
192 genotypically resistant but phenotypically susceptible (19). Accordingly, the 75/130 isolates  
193 with reduced susceptibility ( $\geq 1$   $\mu\text{g/ml}$ ) that harboured no *aac(6')-Ie-aph(2'')-Ia* represented  
194 the equivalent of very major errors (VMEs) as they were genotypically susceptible but  
195 phenotypically resistant (19). This is highly suggestive of novel mechanisms of resistance and  
196 was a feature of other antimicrobials tested (Figure S2).

197 To identify whether efflux pumps might play a role these phenotypes, we assessed the  
198 ARIBA output for the staphylococcal-specific *norABC*, *mgrA*, *mepR* and *qac* genes (20). In the  
199 sequenced NAS collection 168/378 (44.4 %) contained *norA*, however of these less than two  
200 thirds had reduced susceptibility to gentamicin.

201 According to the Comprehensive Antimicrobial Resistance Database [CARD] (11), *tetK* is by  
202 far the most common tetracycline resistance mechanism in *S. aureus* and *S. epidermidis* (10-  
203 20%), followed by *tetL* (<1%) and *tetM* (<1%). This was borne out in our NAS collection,

204 where 48/148 (32.4 %) isolates with MICs  $\geq 2$   $\mu\text{g/ml}$  of tetracycline contained *tetK*, as  
205 compared to 5/223 (2.2 %) with MICs below 2  $\mu\text{g/ml}$ . One animal isolate with an MIC of 16  
206  $\mu\text{g/ml}$  carried *tetL* and one clinical isolate with an MIC of 64  $\mu\text{g/ml}$  carried *tetM*; neither had  
207 any other tetracycline resistance genes. Again, this demonstrated that 98/148 isolates  
208 displayed a reduced susceptibility phenotype that did not associate with a known resistance  
209 determinant, indicative of uncharacterised resistance mechanisms.

210

211 The distribution of erythromycin phenotypes was more complex. With this antimicrobial, we  
212 observed both susceptible isolates and those with reduced susceptibility, but the latter  
213 appeared to consist of two populations, one with MICs between 2 and 256  $\mu\text{g/ml}$  and one  
214 with MICs  $\geq 512$   $\mu\text{g/ml}$  (Figure 1 ERY). We had sequence data available from 135 of the 2-256  
215  $\mu\text{g/ml}$  population and 66 of the  $\geq 512$   $\mu\text{g/ml}$  population, and identified the presence of a  
216 resistance gene (*ermA*, *ermC*, *msrA*) in 65 % (88/135) of the 2-256  $\mu\text{g/ml}$  population and  
217 52/66 (79 %) of the  $\geq 512$   $\mu\text{g/ml}$  population (Table 2). Our results indicated that the presence  
218 of *ermC* rather than *msrA* was the major cause of MICs exceeding 256  $\mu\text{g/ml}$ . In the total  
219 sequenced NAS collection *qac* was observed 100 times, with 64 isolates having a reduced  
220 susceptibility to erythromycin (2-256  $\mu\text{g/ml}$  population). Seven isolates had no other known  
221 mechanisms. *qac* was identified 36 with an MIC of  $\geq 512$   $\mu\text{g/ml}$  and in 23 of these cases *ermC*  
222 was also present, only twice was *qac* found with no other known erythromycin resistance  
223 mechanisms. A total of 101 isolates with an MIC  $\geq 2$   $\mu\text{g/ml}$  did not contain *qac*.

224

225 For daptomycin, approximately half the collection displayed reduced susceptibility (MIC  $\geq 1$   
226  $\mu\text{g/ml}$ , Figure 1 DAP and Table S1). A small subset, comprising seven isolates from clinical  
227 samples only, displayed MICs  $\geq 4$   $\mu\text{g/ml}$ ; such high MICs to daptomycin have not been

228 previously reported, according to the European Committee on Antimicrobial Susceptibility  
229 Testing (EUCAST) and The British Society for Antimicrobial Chemotherapy (BSAC)  
230 surveillance data. These MICs were repeated a second time and confirmed. This is  
231 concerning given that daptomycin is a current therapeutic choice for treating soft tissue  
232 infections caused by NAS (21). Our ARIBA analysis (Table S2) indicated only a single *S.*  
233 *epidermidis* isolate with an MIC of 1 µg/ml contained genes implicated in daptomycin  
234 resistance: *gshF* and *liaFRS*. The remaining 169 isolates with an MIC ≥1 µg/ml did not  
235 harbour any of these genes. Several mutations or genes are associated with daptomycin  
236 resistance in *S. aureus* (including *mprF*, and SNPs in *rpoC*) but none of these were identified  
237 in the NAS collection (6, 22). SNPs in *walk* have also been associated with daptomycin  
238 resistance in *S. aureus* (23); this gene was identified by protein BLAST as present across the  
239 NAS collection but with several differences at the protein level which raises doubts about  
240 whether the SNPs observed in *S. aureus* can be directly extrapolated to NAS. We therefore  
241 conclude that there is a potentially novel daptomycin resistance mechanism present in  
242 these strains, which we are evaluating further.

243

#### 244 *Resistance to vancomycin found in clinical samples*

245 Vancomycin is a treatment option in prosthetic joint infection, and 94 % of isolates had an  
246 MIC below 4 µg/ml (Figure 1 VAN). However, of the 24 isolates with reduced susceptibility,  
247 22 (92 %) came from clinical samples and only 2/24 were found in healthy volunteers. This is  
248 indicative of a wider trend, where isolates associated with clinical samples had significantly  
249 higher MICs ( $p < 0.005$ ) than non-clinical isolates for cefoxitin, erythromycin, gentamicin,  
250 tetracycline, daptomycin and vancomycin (Figure S1). Given the importance of NAS in  
251 nosocomial infections, this is a worrying prospect both in terms of what is presenting in the

252 clinic and also the possibility of AMR gene transfer into organisms more capable of causing  
253 infection, including *S. aureus*. In addition, no known mechanisms of resistance were  
254 identified for vancomycin, rifampicin or teicoplanin (Figure S2 and Table S3).

255

#### 256 *Over half of the NAS collection displayed susceptibility to multiple antimicrobials*

257 Out of the all the isolates tested, 49 % (187/394) had reduced susceptibility to three or more  
258 antimicrobials. Twenty-four isolates had reduced susceptibility to six antimicrobials, and  
259 three isolates had reduced susceptibility to seven antimicrobials; of these 23/24 and 3/3  
260 were isolated from clinical samples (Table S1). The implications of these are difficult to treat  
261 infections and potentially a large reservoir of staphylococcal resistance genes within the  
262 patient under antimicrobial treatment.

263

#### 264 *Animal isolates have similar MIC distributions to human isolates*

265 It is generally acknowledged that the presence of reduced susceptibility in microorganisms  
266 isolated from animals can impact upon public health if those organisms also cause infection  
267 in humans (24, 25). In our collection there were 40 NAS isolated from animals (including 7  
268 NCTC strains), of which we obtained genome sequences from 29. Although in much fewer  
269 numbers than the human isolates in the collection, the animal isolates displayed very similar  
270 MIC distributions and harboured corresponding genetic mechanisms. This does not rule out  
271 the possibility that animals could be a reservoir of AMR for staphylococci.

272

#### 273 **Conclusion**

274 Genome analysis of isolates displaying MICs to cefoxitin of  $\geq 4$   $\mu\text{g/ml}$  indicated that  
275 approximately half harboured the *mecA* element. The absence of *mecA* from the other half

276 suggests that other mechanisms are likely present. This was apparent across many of the  
277 antimicrobials tested as between 0 and 70 % of phenotypic resistance in clinical isolates  
278 could be attributed to known resistance mechanisms. The remaining 30-100 % suggests that  
279 there are potentially numerous unknown mechanisms underpinning NAS resistance, which  
280 warrant further investigation.

281

## 282 **Acknowledgements**

283 We thank David Livermore and Iain McNamara for productive discussions on antimicrobial  
284 usage. We also thank the University of East Anglia's HPC and the Quadram Institute for the  
285 Bioinformatics team for their support.

286

## 287 **Funding**

288 This work was funded by the Orthopaedics Trust (registered charity 1110248).

289 G.C.L. and J.W were funded by the BBSRC Institute Strategic Programme Microbes in the  
290 Food Chain BB/R012504/1  
291

## 292 **Transparency declarations**

293 None to declare.

294

## 295 **References**

- 296 1. Becker K, Heilmann C, Peters G. Coagulase-Negative Staphylococci. *Clinical*  
297 *Microbiology Reviews*. 2014;27(4):870-926.
- 298 2. NJR. 14th Annual Report 2017. In: National Joint Registry for England W, Northern  
299 Ireland and the Isle of Man, editor. 2017.
- 300 3. Lamagni T. Epidemiology and burden of prosthetic joint infections. *J Antimicrob*  
301 *Chemother*. 2014;69:i5-i10.
- 302 4. Aggarwal V, Bakhshi. H., Ecker, NU., Parvizi, J., Gehrke, T., Kendodd, D. Organism  
303 profile in periprosthetic joint infection: pathogens differ at two arthroplasty infection

- 304 referral centers in Europe and in the United States. *The Journal of Knee Surgery*  
305 2014;27(399-406).
- 306 5. Morgenstern M, Erichsen, C., Hackl, S., Mily, J., Militz, M., Friederichs, J., Hungerer,  
307 S., Buhren, V., Moriarty, TF., Post, V., Richards, RG. and Kates, SL. Antibiotic resistance of  
308 commensal *Staphylococcus aureus* and coagulase-negative staphylococci in an international  
309 cohort of surgeons: a prospective point-prevalence study. . *Morgenstern M, Erichsen C,*  
310 *Hackl S.* 2016;11(2)::e0148437.
- 311 6. Sabat A, Tinelli M, Grundmann H, Akkerboom V, Monaco M, Del Grosso M, et al.  
312 Daptomycin Resistant *Staphylococcus aureus* Clinical Strain With Novel Non-synonymous  
313 Mutations in the *mprF* and *vraS* Genes: A New Insight Into Daptomycin Resistance. *Front*  
314 *Microbiol.* 2018;9:2705.
- 315 7. Swenson J, Brasso, WB., Ferraro, MJ., Hardy, DJ., Knapp, CC., Lonsway, D., McAllister,  
316 S., Reller, LB., Sader, HS., Shortridge, D., Skov, R., Weinstein MP., Zimmer, BL., and Patel,  
317 JB. Correlation of Cefoxitin MICs with the Presence of *mecA* in *Staphylococcus* spp. *J Clin*  
318 *Microbiol* 2009;47(6):1902-5.
- 319 8. Babraham Bioinformatics. FastQC: A quality control tool for high throughput  
320 sequence data [Available from:  
321 <http://www.bioinformatics.babraham.ac.uk/projects/fastqc/>.
- 322 9. Bolger A, Lohse, M., and Usadel, B. . Trimmomatic: a flexible trimmer for Illumina  
323 sequence data. *Bioinformatics.* 2014;30(15):2114-20.
- 324 10. Institute JG. BBNorm: Kmer-based error-correction and normalization tool.  
325 [Available from: <https://sourceforge.net/projects/bbmap/>.
- 326 11. Jia B, Raphernua, AR., Alcock, B., Waglechner, N., Guo, P., Tsang, KK., Lago, BA.,  
327 Dave, BM., Pereira S., Sharma, AN., Doshi, S., Courtot, M., Lo, R., Williams, LE., Frye, JG.,  
328 Elsayegh, T., Sarder, D., Westman, EL., Pawlowski, AC., Johnson, TA., Brinkman, FS., Wright,  
329 GD. and McArthur, AG. CARD 2017: expansion and model-centric curation of the  
330 comprehensive antibiotic resistance database. *Nucleic Acids Res* 2017;4(45(D)):D566-D73.
- 331 12. Hunt M, Mather, AE., Sánchez-Busó, L., Page, AJ., Parkhill, J., Keane, JA., Harrish, SR.  
332 ARIBA: rapid antimicrobial resistance genotyping directly from sequencing reads. *Microb*  
333 *Genom.* 2017;3(10):e000131.
- 334 13. Seemann T. ABRicate: mass screening of contigs for antibiotic resistance genes.  
335 2016.
- 336 14. EUCAST. EUCAST guidelines for detection of resistance mechanisms and specific  
337 resistances of clinical and/or epidemiological importance. Version 2.0: The European  
338 Committee on Antimicrobial Susceptibility Testing; 2017 [updated March 2018. Available  
339 from: <http://www.eucast.org>.
- 340 15. Ferretti J, Gilmore, K., Courvalin, P. Nucleotide sequence analysis of the gene  
341 specifying the bifunctional 6'-aminoglycoside acetyltransferase 2''-aminoglycoside  
342 phosphotransferase enzyme in *Streptococcus faecalis* and identification and cloning of gene  
343 regions specifying the two activities. *J Bacteriol.* 1986;167:631-8.
- 344 16. Chow J. Aminoglycoside resistance in *enterococci*. *Clin Infect Dis.* 2000;31:586-9.
- 345 17. Perreten V, Kadlec, K., Schwarz, S., Grönlund Andersson, U., Finn, M., Greko, C.,  
346 Moodley, A., Kania, SA., Frank, LA., Bemis, DA., Franco, A., Iurescia, M., Battisti, A., Duim, B.,  
347 Wagenaar, JA., van Duijkeren, E., Weese, JS., Fitzgerald, JR., Rossano, A., Guardabassi, L. .  
348 Clonal spread of methicillin-resistant *Staphylococcus pseudintermedius* in Europe and North  
349 America: an international multicentre study. *J Antimicrob Chemother* 2010;65:1145-54.

- 350 18. Schmitz F-J, Fluit, AC., Gondolf, M., Beyrau, R., Lindenlauf, E., Verhoef, J., Heinz, HP.,  
351 Jones, ME. The prevalence of aminoglycoside resistance and corresponding resistance genes  
352 in clinical isolates of staphylococci from 19 European hospitals. J Antimicrob Chemother.  
353 1999;43:253-9.
- 354 19. Neuert S, Nair, S., Day, MR., Doumith, M., Ashton, PM., Mellor, KC., Jenkins, C.,  
355 Hopkins, KL., Woodford, N2., de Pinna, E., Godbole, G., Dallman, TJ.,. Prediction of  
356 Phenotypic Antimicrobial Resistance Profiles From Whole Genome Sequences of Non-  
357 typhoidal *Salmonella enterica*. Front Microbiol. 2018;9:592.
- 358 20. Sapula SA, Brown MH. Antimicrobial Drug Efflux Pumps in *Staphylococcus aureus*. In:  
359 Li X-Z, Elkins CA, Zgurskaya HI, editors. Efflux-Mediated Antimicrobial Resistance in Bacteria:  
360 Mechanisms, Regulation and Clinical Implications. Cham: Springer International Publishing;  
361 2016. p. 165-95.
- 362 21. White B, Seaton, RA. . Complicated skin and soft tissue infections: literature review  
363 of evidence for and experience with daptomycin. Infect Drug Res. 2011;4:115.
- 364 22. Friedman L, Alder, JD., Silverman, JA. . Genetic changes that correlate with reduced  
365 susceptibility to daptomycin in *Staphylococcus aureus*. Antimicrob Agents Chemother  
366 2006;50:2137-45.
- 367 23. Yang S, Mishra, NN.. Rubio, A., Bayer, AS. Additional routes to *Staphylococcus aureus*  
368 daptomycin resistance as revealed by comparative genome sequencing, transcriptional  
369 profiling, and phenotypic studies. Antimicrobial Agents and Chemotherapy.  
370 2013;57(11):5658-64.
- 371 24. Landers T, Cohen, B., Wittum, TE., Larson, EL. A review of antibiotic use in food  
372 animals: perspective, policy, and potential. . Public Health Rep. 2012;127:4-22.
- 373 25. Woolhouse M, Ward, M., van Bunnik, B. . Antimicrobial resistance in humans,  
374 livestock and the wider environment. Phil Trans R Soc B. 2015;370:20140083.
- 375

376

377

378

## 379 **Figure legends**

380 Figure 1. Antibiotic susceptibility of NAS collection

381 MIC distributions for 400 NAS isolates grown in the presence of antimicrobials. FOX

382 cefoxitin, GEN gentamicin, TET tetracycline, ERY erythromycin, DAP daptomycin, VAN

383 vancomycin, RIF rifampicin and TEC teicoplanin.

384

385 Figure 2. Presence of *mecA* in relation to high cefoxitin MIC.

386 Per staphylococcal species, bars display the number of isolates found to have a ceftiofur  
387 MIC of  $\geq 4$   $\mu\text{g/ml}$  [red] or  $< 4$   $\mu\text{g/ml}$  [peach] (4 isolates had no MIC data [blue], in relation to  
388 the presence [stripe] and absence [dots] of *mecA*. Sum of the MIC bar is the total number of  
389 isolates sequenced for that species.

390

391

392



393 Table 1

394 Frequency of non-*aureus* staphylococcal species in the study collection

|                                       |     |
|---------------------------------------|-----|
| <i>Staphylococcus auricularis</i>     | 1   |
| <i>Staphylococcus capitis</i>         | 20  |
| <i>Staphylococcus caprae</i>          | 2   |
| <i>Staphylococcus carnosus</i>        | 2   |
| <i>Staphylococcus chromogenes</i>     | 3   |
| <i>Staphylococcus cohnii</i>          | 1   |
| <i>Staphylococcus condimenti</i>      | 1   |
| <i>Staphylococcus devriesei</i>       | 1   |
| <i>Staphylococcus epidermidis</i>     | 191 |
| <i>Staphylococcus equorum</i>         | 1   |
| <i>Staphylococcus haemolyticus</i>    | 43  |
| <i>Staphylococcus hominis</i>         | 45  |
| <i>Staphylococcus jettensis</i>       | 1   |
| <i>Staphylococcus lugdunensis</i>     | 7   |
| <i>Staphylococcus massiliensis</i>    | 1   |
| <i>Staphylococcus microti</i>         | 1   |
| <i>Staphylococcus muscae</i>          | 1   |
| <i>Staphylococcus nepalensis</i>      | 1   |
| <i>Staphylococcus pasteurii</i>       | 4   |
| <i>Staphylococcus petrasii</i>        | 1   |
| <i>Staphylococcus pettenkferi</i>     | 1   |
| <i>Staphylococcus piscifermentans</i> | 1   |
| <i>Staphylococcus rostri</i>          | 1   |
| <i>Staphylococcus saprophyticus</i>   | 22  |
| <i>Staphylococcus sciuri</i>          | 5   |
| <i>Staphylococcus simiae</i>          | 1   |
| <i>Staphylococcus simulans</i>        | 10  |
| <i>Staphylococcus sp [1]</i>          | 1   |
| <i>Staphylococcus stepanovicii</i>    | 1   |
| <i>Staphylococcus succinus</i>        | 1   |
| <i>Staphylococcus vitulinus</i>       | 3   |
| <i>Staphylococcus warneri</i>         | 18  |
| <i>Staphylococcus xylosus</i>         | 1   |

395

396 \*Species designated by MALDI-TOF (Bruker)

397

398 Table 2 Genetic mechanisms of resistance identified with ARIBA and ABRicate using CARD  
 399 database compared to the MIC data (of sequenced isolates only) using 90 % match ID  
 400 (partial and interrupted sequences are not included, see table S2)  
 401

| <i>Antimicrobial</i> | <i>Mechanism (Accession No.)</i>          | <i>No. isolates above breakpoint MIC (<math>\geq 2 \mu\text{g/ml}</math>)</i> |                                                     | <i>No. isolates below breakpoint</i> |
|----------------------|-------------------------------------------|-------------------------------------------------------------------------------|-----------------------------------------------------|--------------------------------------|
| TET                  | <i>tetK</i> (NC_013452)                   | 48/148 (32.4%)                                                                |                                                     | 8/223 (3.6 %)                        |
|                      | <i>tetL</i> (M11036.0)                    | 1/148 (0.7 %)                                                                 |                                                     | 0/223                                |
|                      | <i>tetM</i> (AM180355)                    | 1/148 (0.7 %)                                                                 |                                                     | 0/223                                |
|                      | <b>All</b>                                | <b>50/148 (33.8 %)</b>                                                        |                                                     | <b>8/232 (3.6 %)</b>                 |
|                      |                                           |                                                                               |                                                     |                                      |
|                      |                                           | <i>No. isolates above breakpoint MIC (<math>\geq 1 \mu\text{g/ml}</math>)</i> |                                                     |                                      |
| GEN                  | <i>aac(6')-Ie-aph(2'')-Ia</i> (NC_005024) | 49/130 (37.7 %)                                                               |                                                     | 6/ 246 (2.4 %)                       |
|                      | <i>aph(3)IIIa</i> (CP004067)              | 13/ 130 (10 %)                                                                |                                                     | 7/ 246 (2.8 %)                       |
|                      | <b>All*</b>                               | <b>59<sup>e1</sup>/130 (22.3%)</b>                                            |                                                     | <b>12<sup>e2</sup>/246 (4.9 %)</b>   |
|                      |                                           |                                                                               |                                                     |                                      |
|                      |                                           | <i>MIC <math>\geq 512 \mu\text{g/ml}</math></i>                               | <i>MIC <math>\geq 2 - 256 \mu\text{g/ml}</math></i> |                                      |
| ERY                  | <i>msrA</i> (NC_022598.1)                 | 6/ 66 (9 %)                                                                   | 75/135 (55.5 %)                                     | 9/171(5.2 %)                         |
|                      | <i>ermC</i> (M12730)                      | 42/ 66 (63.6 %)                                                               | 13/135 (9.6 %)                                      | 9/171 (5.2 %)                        |
|                      | <i>ermA</i> (NC_009632)                   | 6/ 66 (9%)                                                                    | 1/135 (0.7 %)                                       | 0/171                                |
|                      | <i>emeA</i> (AB091338)                    | 1/ 66 (1.5 %)                                                                 | 0/135                                               | 0/171                                |
|                      | <b>All*</b>                               | <b>52<sup>e1</sup>/66 (78.7 %)</b>                                            | <b>88<sup>e2</sup>/135 (65.2 %)</b>                 | <b>18/171 (10.5 %)</b>               |

402

403 \*Some isolates harboured multiple resistance genes. TET tetracycline, GEN gentamicin, ERY  
 404 erythromycin; g1: 3 - isolates contained multiple resistance genes; g2: 1 isolate contained  
 405 multiple resistance genes; e1: 3 isolates contained multiple resistance genes; e2; 1 isolate  
 406 contained multiple resistance genes  
 407

408 Supplementary data

409 Table S1. MIC characterisation of the NAS collection

410 MIC data for all isolates tested; all MIC are shown in  $\mu\text{g/ml}$ ; FOX ceftiofur, GEN gentamicin,  
411 TET tetracycline, ERY erythromycin, DAP daptomycin, VAN vancomycin, RIF rifampicin and  
412 TEC teicoplanin.

413

414 Table S2. ARIBA characterisation of all sequenced NAS isolates, grouped by relevant  
415 antimicrobial.

416

417 Table S3. Summary of ARIBA/ABRicate match data for all sequenced isolates.

418

419 Table S4. Comparison of gene presence (using ARIBA) and protein BLAST presence. Data  
420 includes all genes identified in the CARD database.

421

422 Figure S1. MICs in clinical and non-clinical isolates

423 Box and whisker plot of MIC distribution per antimicrobial for clinical (orange) and non-  
424 clinical (yellow) isolates. Thick black bar indicates the median MIC which resided within the  
425 Interquartile Range. The extreme lines are represented as dotted lines and indicate the data  
426 outside the upper (75%) and lower (25%) quartiles, open circles represent potential outliers.

427 Levels of significance from Mann-Whitney U test denoted by \*\*\*\* ( $p < 0.0001$ ), \*\*\*  
428 ( $p < 0.005$ ), \*\* ( $p = 0.001$ ) and \* ( $p = 0.01$ ).

429

430 Figure S2. Mechanisms of resistance

431 Percentage of known genetic mechanisms identified in sequenced NAS isolates with  
432 reduced susceptibility. Number of isolates with reduced susceptibility per antimicrobial

433 given in parentheses. Known mechanisms found per antimicrobial are shown in italics. FOX

434 ceftiofur, GEN gentamicin, TET tetracycline, ERY erythromycin, DAP daptomycin, VAN

435 vancomycin, RIF rifampicin and TEC teicoplanin.

436

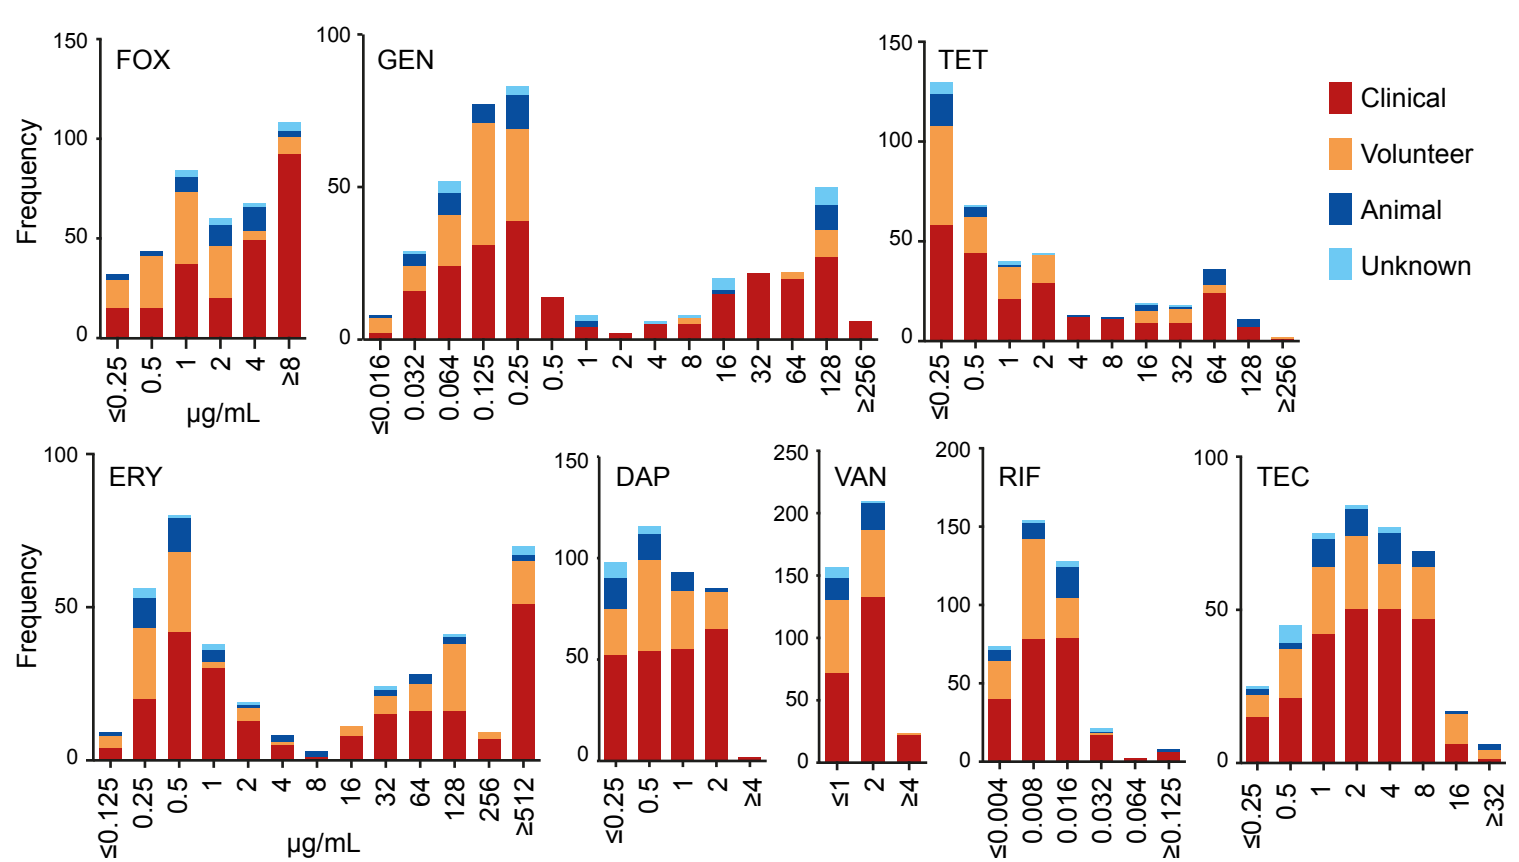

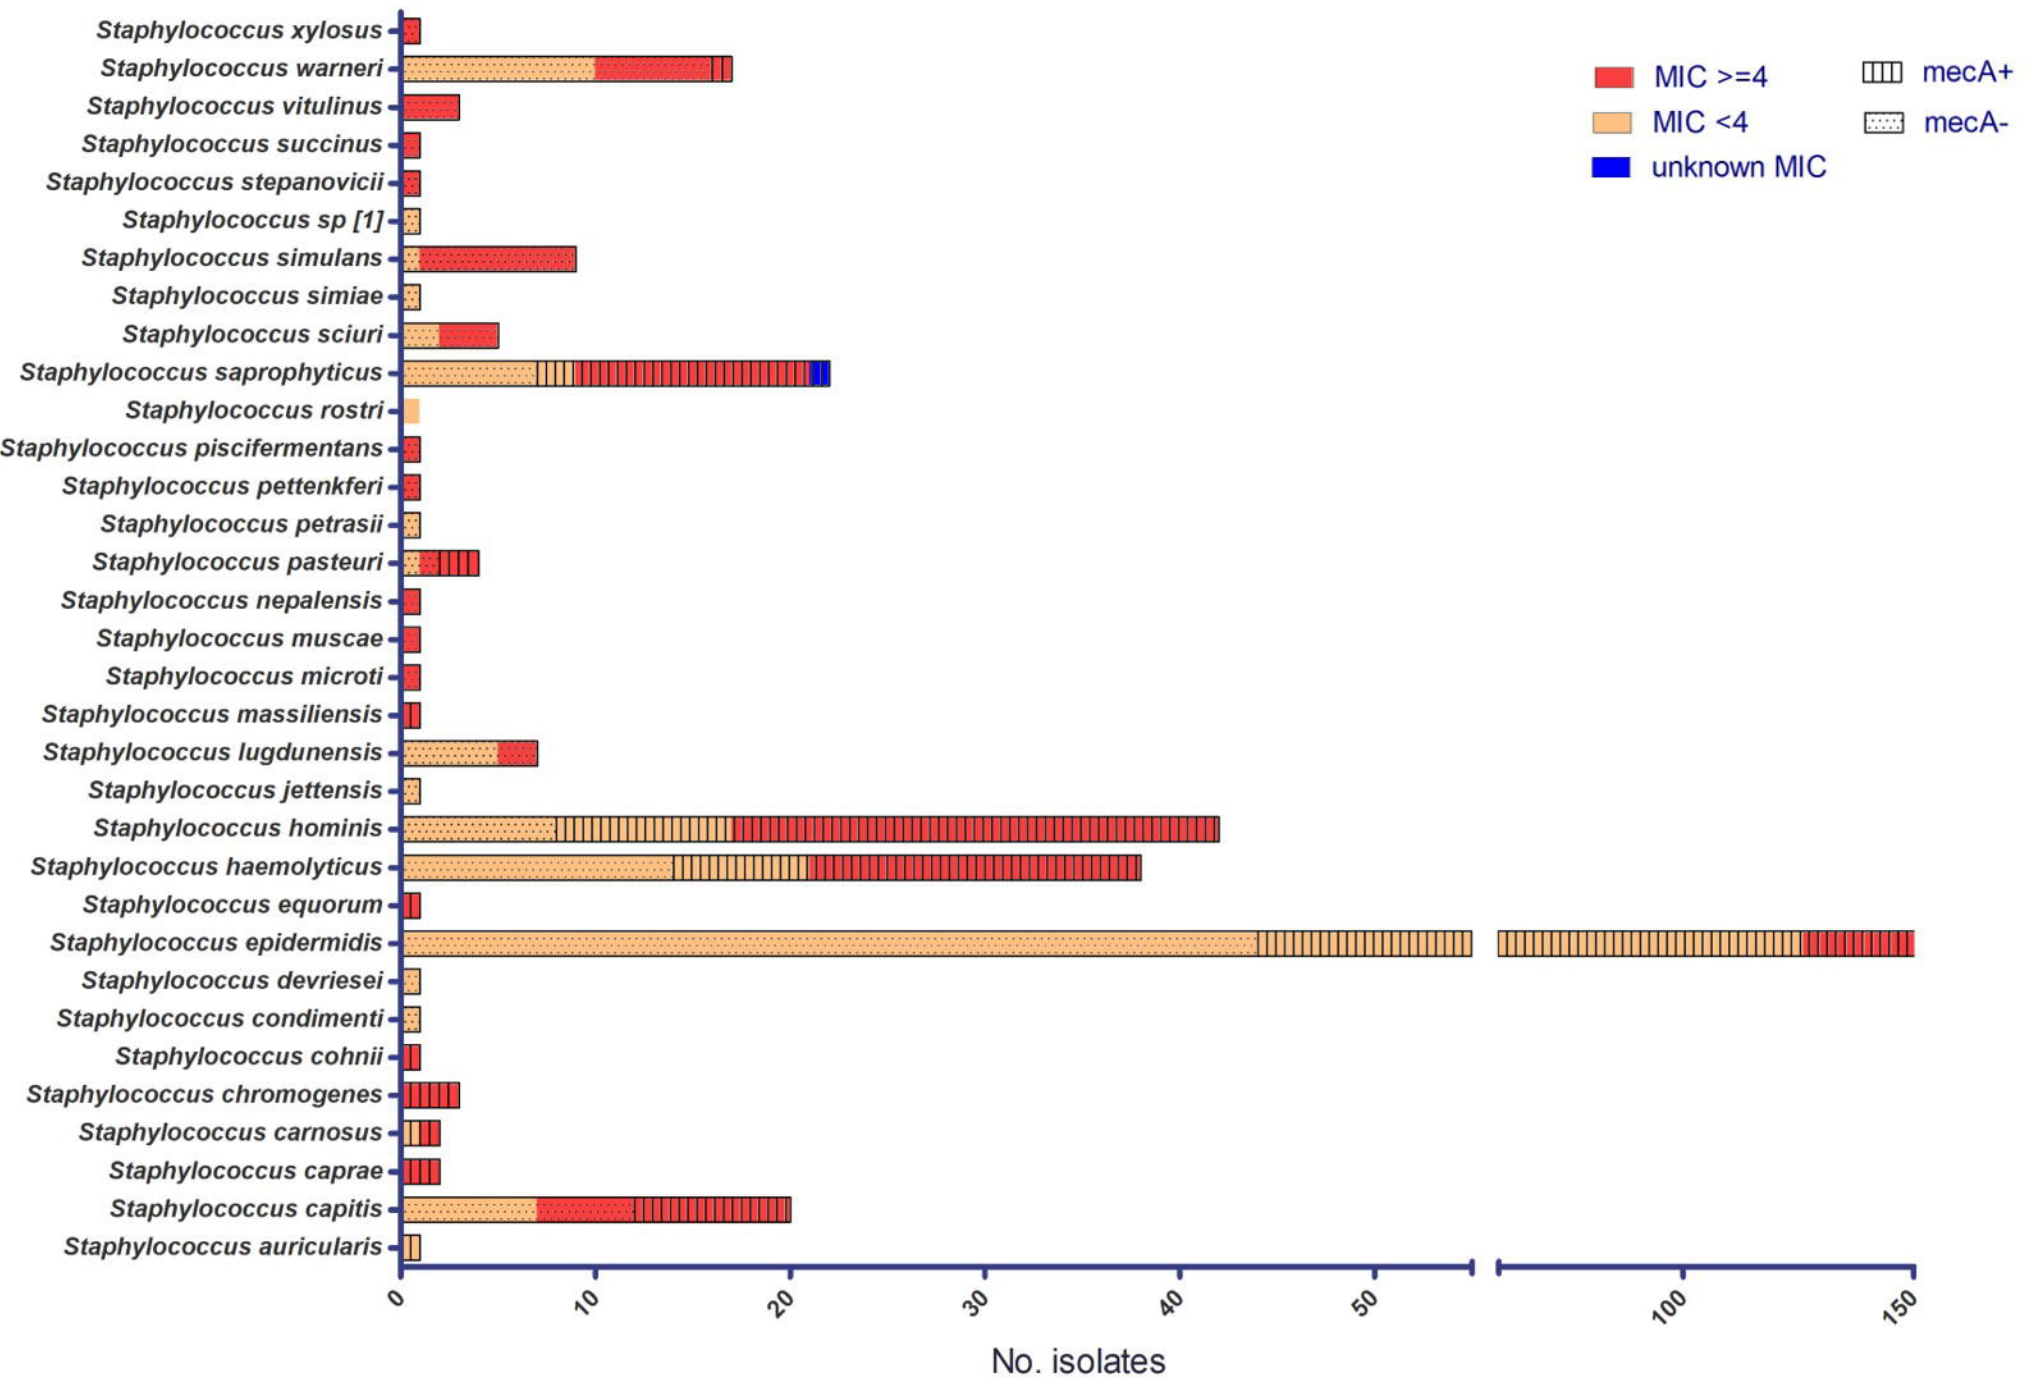

Source: https://www.biorxiv.org/content/biorxiv/early/2021/06/22/2021.06.22.449369.full.pdf
